# Supplementary material
Source: Springer Nature journal article supplement (https://www.springermedizin.de/resource/supplementary/13048_2013_193_MOESM5_ESM.pdf/9665106)

**A SKOV3**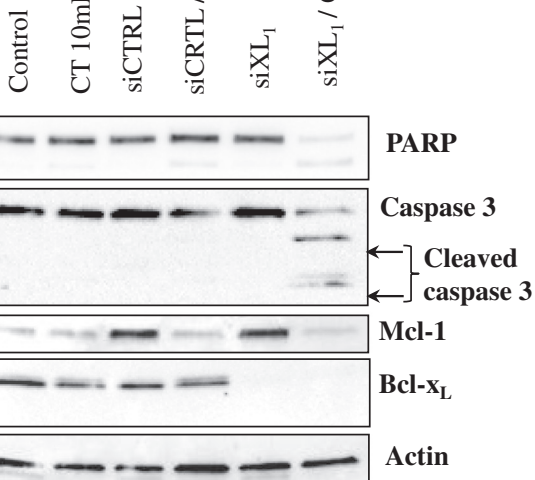**B IGROV1-R10**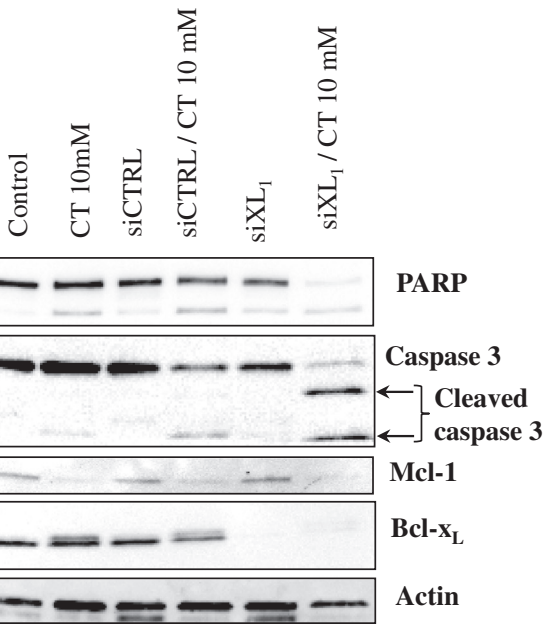

Supplement: MOESM5 [file 9665106]
